# Supplementary material for: Characterization of the reproductive tract bacterial microbiota of virgin, mated, and blood-fed Aedes aegypti and Aedes albopictus females
Source: PubMed Central journal article supplement (PMC8638121; doi:10.1186/s13071-021-05093-7), 2021-12-01

# *Aedes aegypti*

## A

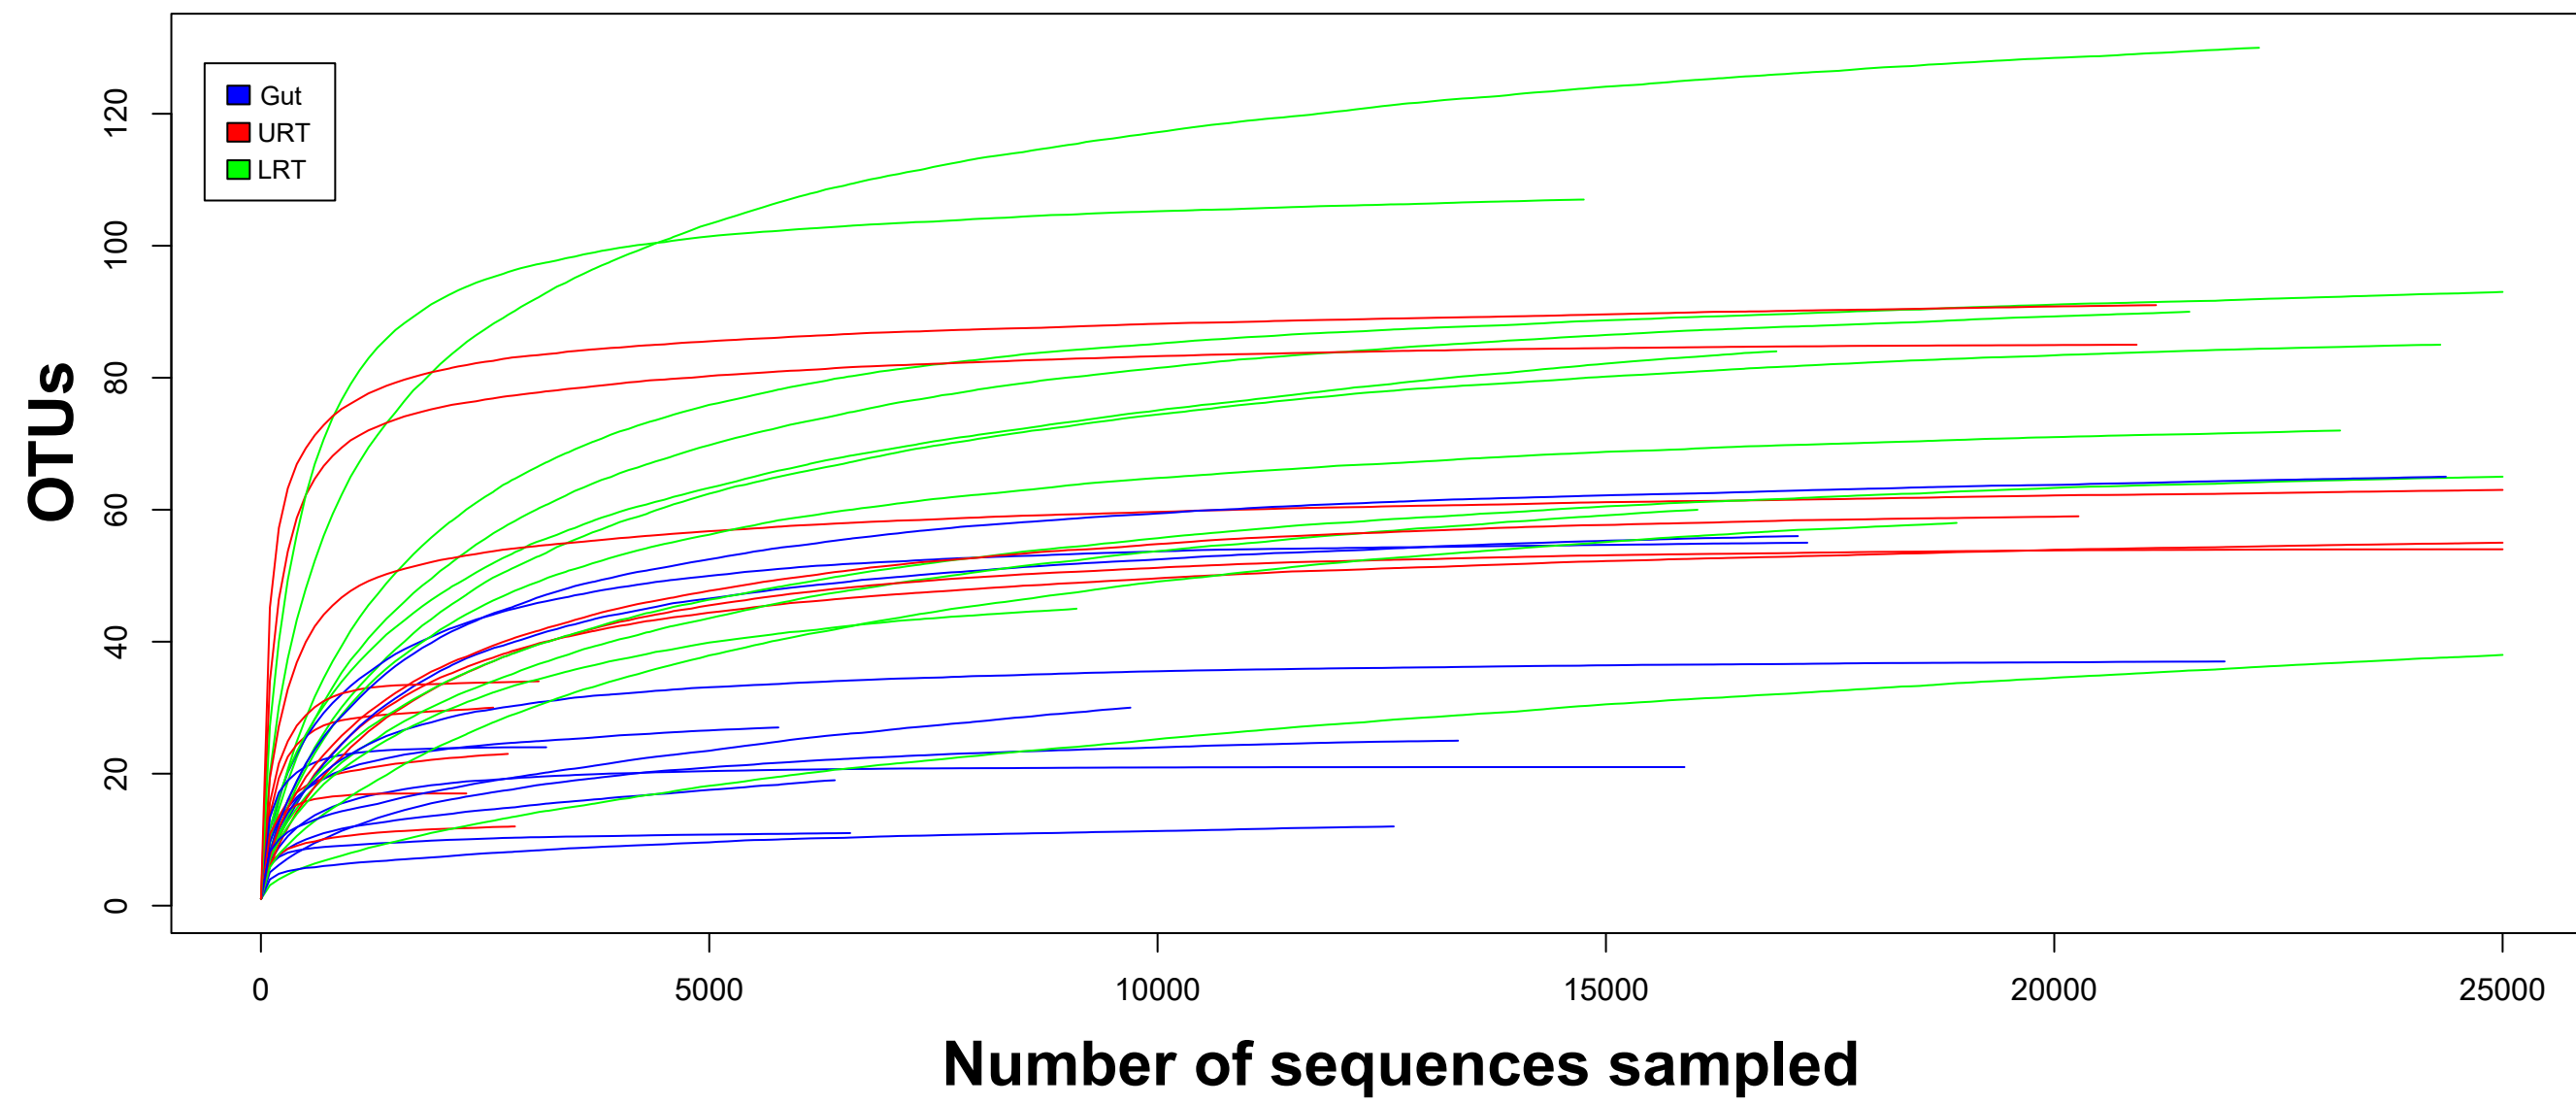

# *Aedes albopictus*

## B

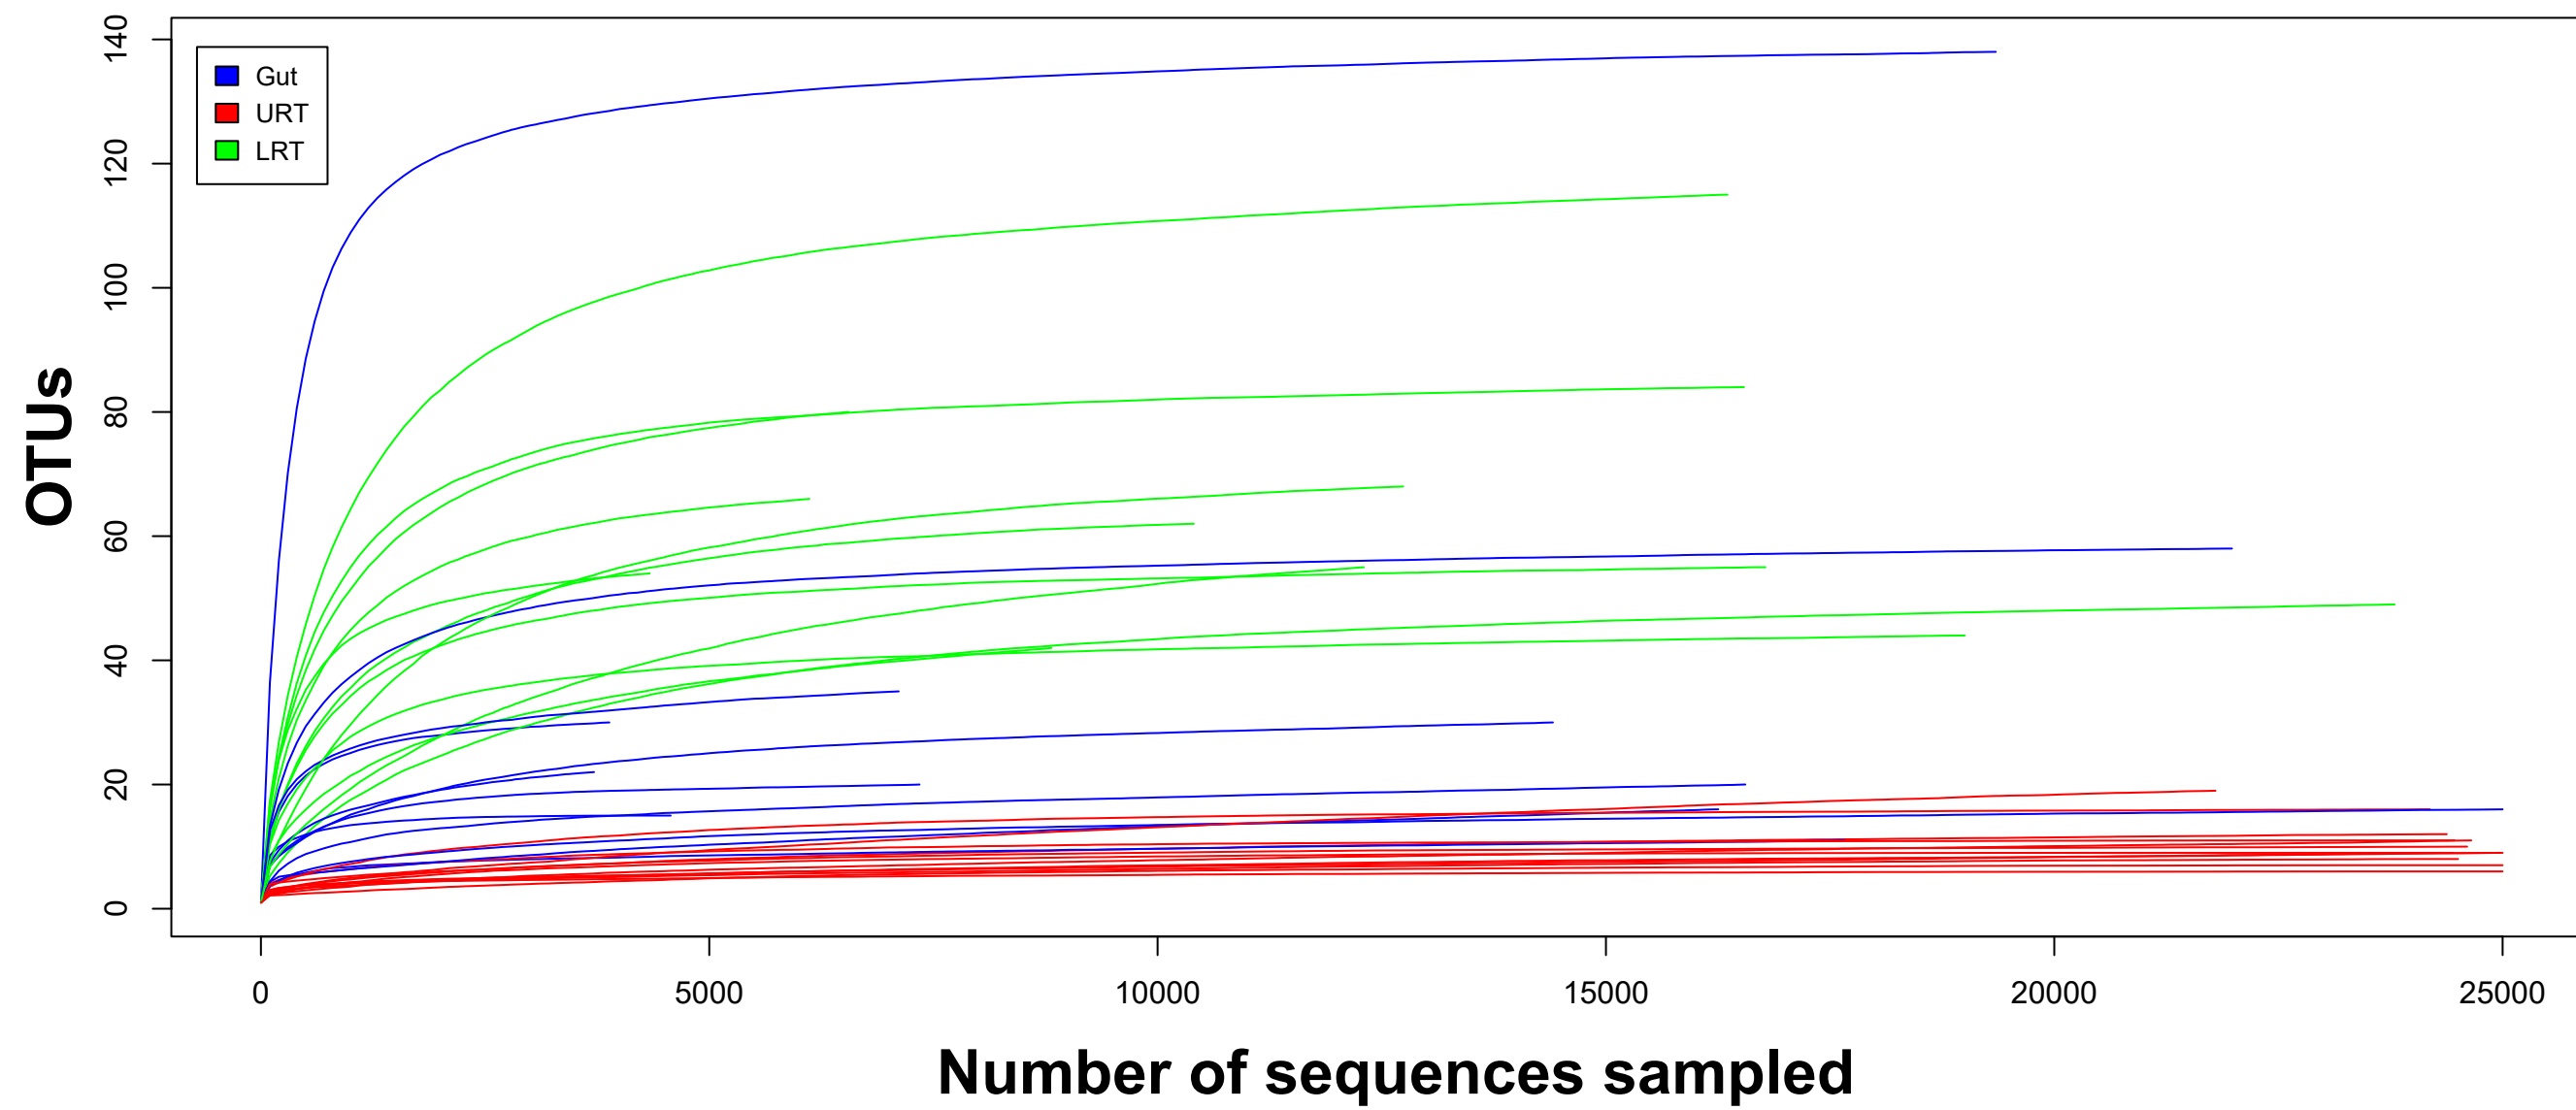

# Controls

## C

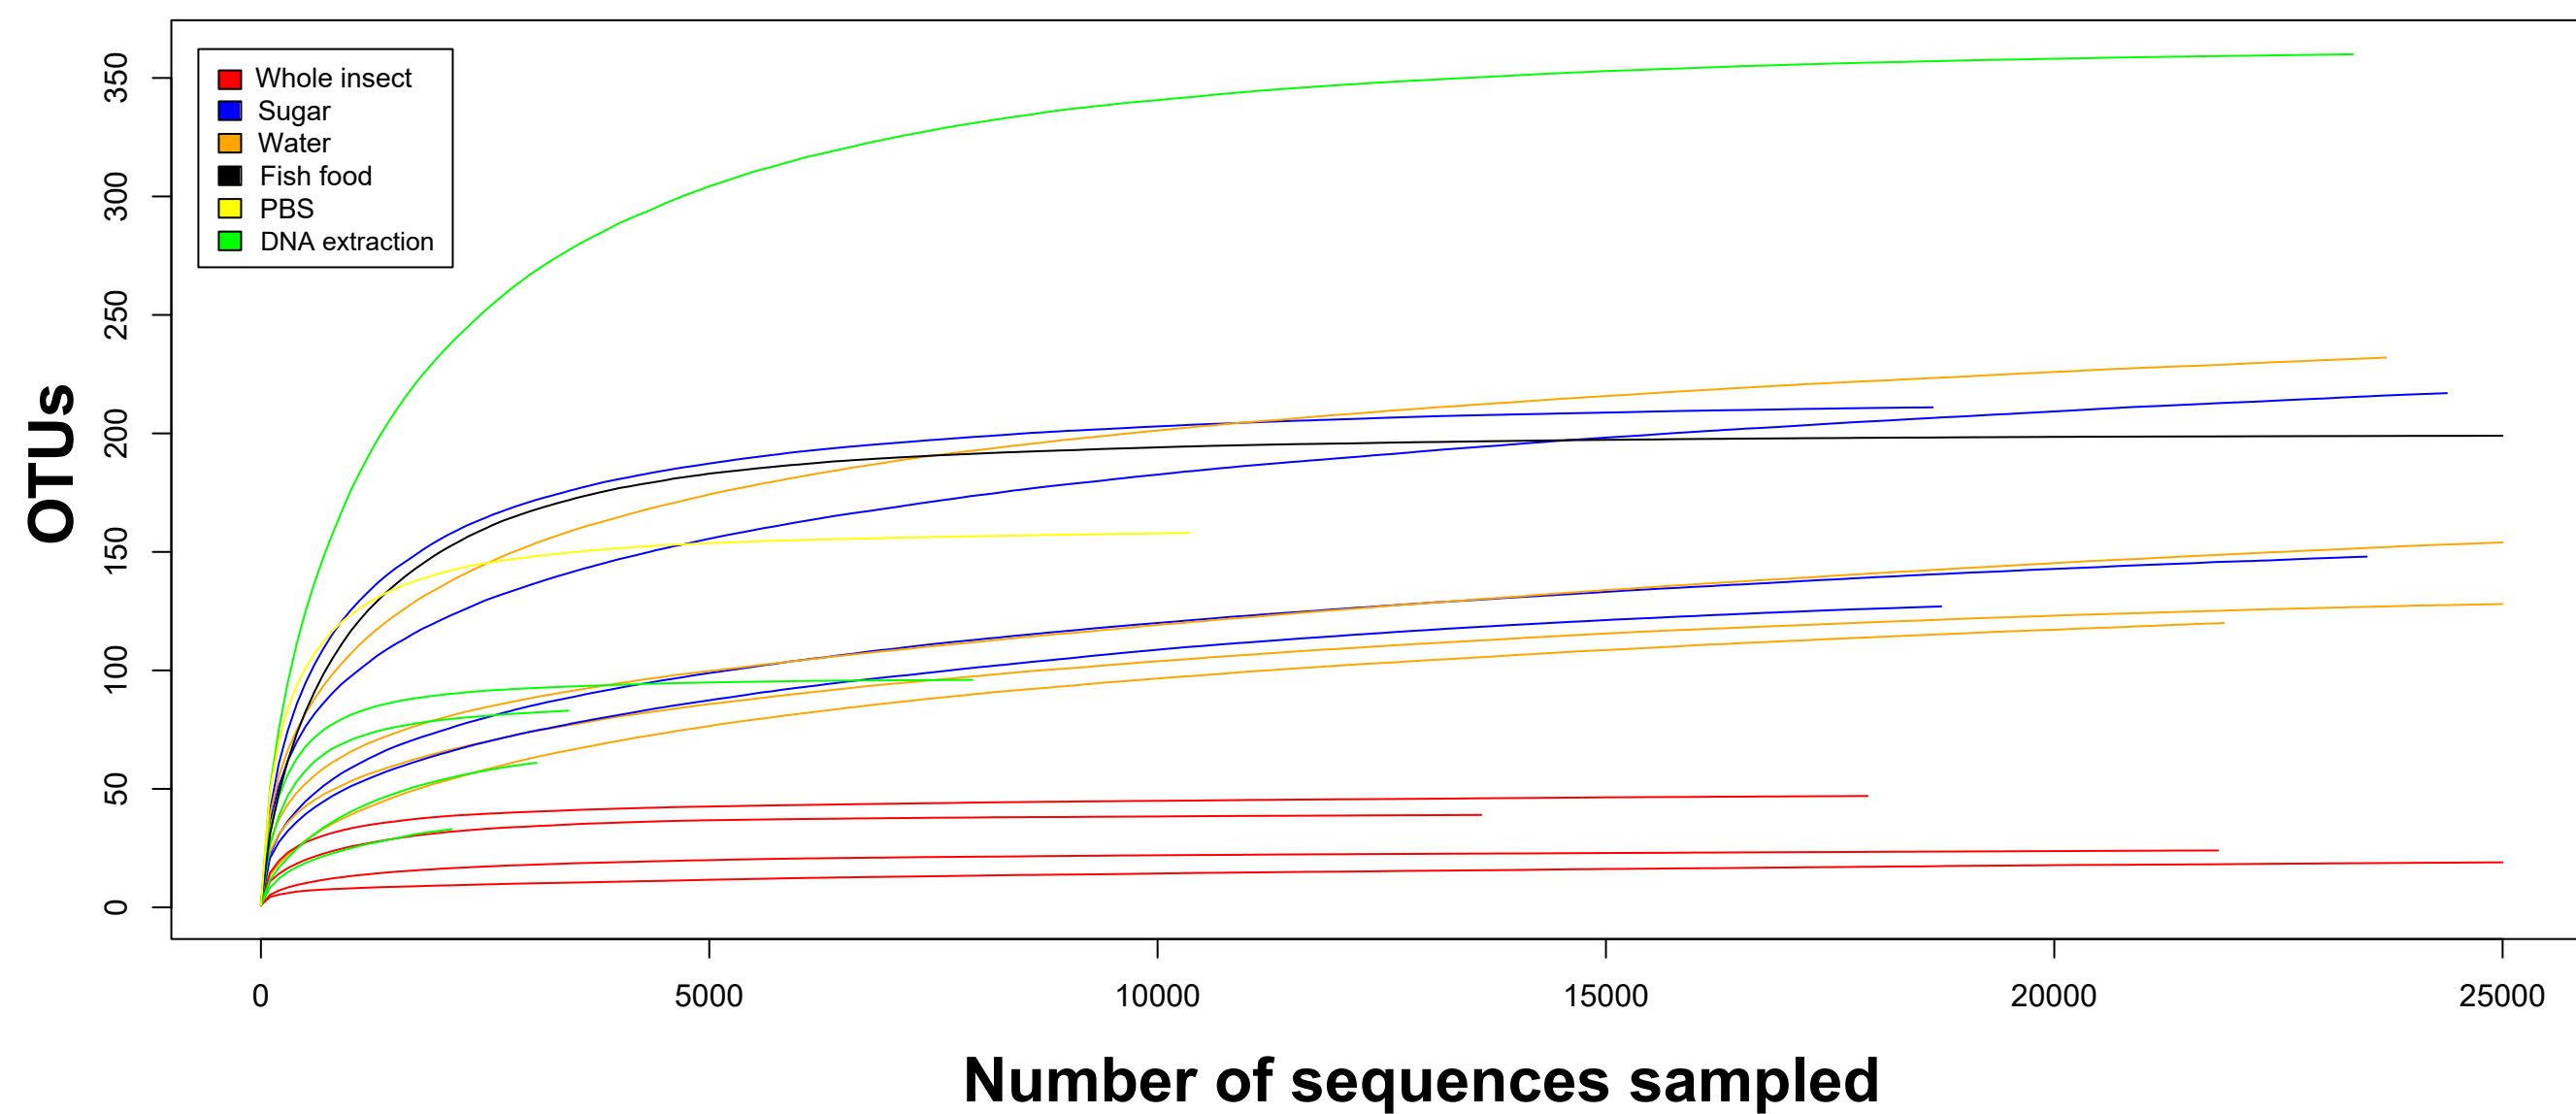

Supplement: 13071_2021_5093_MOESM2_ESM.pdf [file 13071_2021_5093_MOESM2_ESM.pdf]
