# Supplementary material for: Characterization of the reproductive tract bacterial microbiota of virgin, mated, and blood-fed Aedes aegypti and Aedes albopictus females
Source: PubMed Central journal article supplement (PMC8638121; doi:10.1186/s13071-021-05093-7), 2021-12-01
Supplement: 13071_2021_5093_MOESM4_ESM.pdf [file 13071_2021_5093_MOESM4_ESM.pdf]

Ind. 1    Ind. 2    Ind. 3    NC

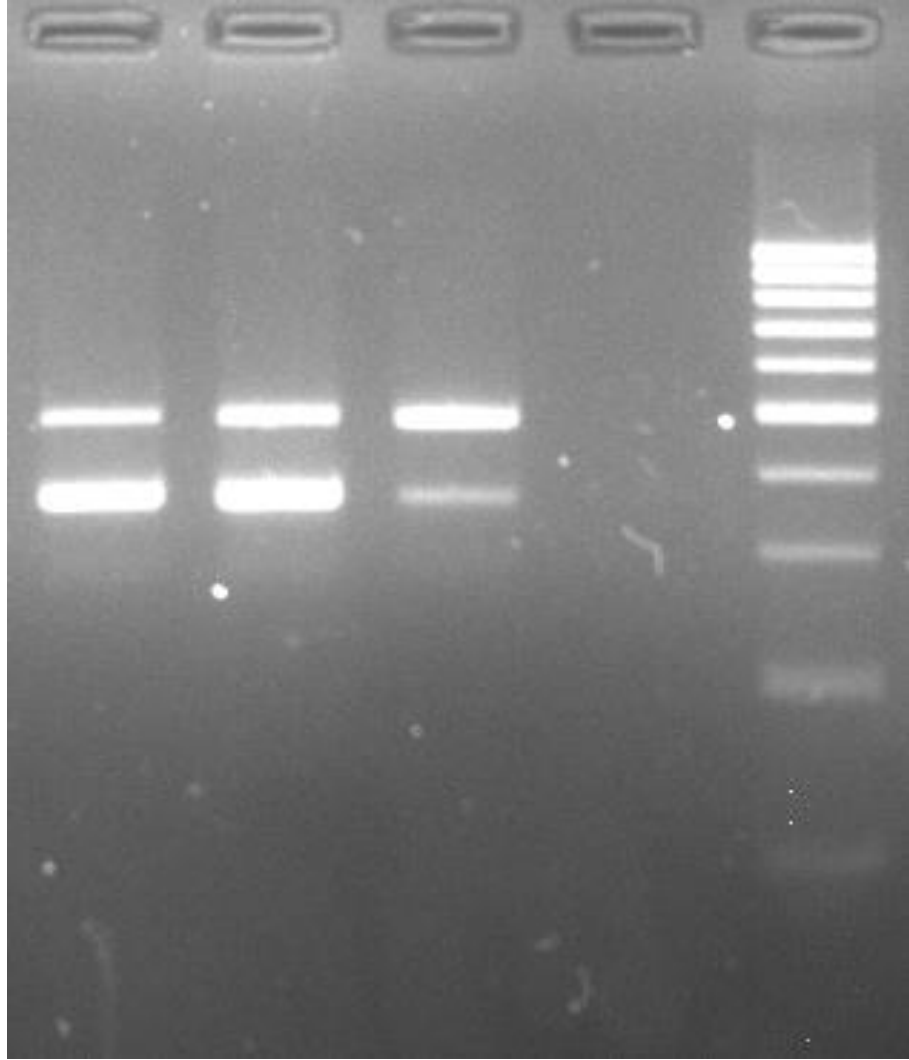

- ← 1000 bp
- ← 900 bp
- ← 800 bp
- ← 700 bp
- ← 600 bp
- ← 500 bp
- ← 400 bp
- ← 300 bp
- ← 200 bp
- ← 100 bp
